# Supplementary material
Source: Springer Nature journal article supplement (https://www.springermedizin.de/resource/supplementary/13030_2012_120_MOESM1_ESM.pdf/9644796)
Supplement: MOESM1 [file 9644796]

Table 2. Studies examining the effects of alexithymia on health outcomes with a prospective cohort design in clinical population.

| Type of participants                             | Followup period | Type of treatment                         | Type of main outcome                          | N   | Country     | Ref. No. |
|--------------------------------------------------|-----------------|-------------------------------------------|-----------------------------------------------|-----|-------------|----------|
| <b>Adverse effect</b>                            |                 |                                           |                                               |     |             |          |
| Psychiatric inPT                                 | 4, 8-12 W       | Multimodal psychotherapy                  | Global severity Index and depression severity | 480 | Germany     | 24       |
| Substance users                                  | 10+15W          | Motivational intervention                 | Response to treatment                         | 260 | USA         | 25       |
| Psychiatric outPT                                | 12-20 W         | Short-term psychotherapy                  | Psychiatric symptomatology                    | 251 | Canada      | 26       |
| Hemodialysis outPT                               | 5 Y             | Hemodialysis therapy                      | All cause mortality                           | 230 | Japan       | 27       |
| Hemodialysis outPT                               | 6 M             | Hemodialysis therapy                      | Depression deterioration                      | 230 | Japan       | 28       |
| OutPT with possible depression                   | 6 Y             | Psychotherapy                             | Recovery from depression                      | 121 | Finland     | 29       |
| Veterans with military sexual trauma.            | 7 W             | Specialized residential treatment         | Symptom persistence                           | 175 | USA         | 30       |
| Women taking elective surgical abortion          | 2 M             | Surgical abortion                         | Re-experience and avoidance                   | 140 | Netherlands | 31       |
| OutPT with functional gastrointestinal disorders | 6 M             | Unspecified treatment                     | Response to treatment                         | 112 | Italy       | 32       |
| PT taking implantable cardioverter defibrillator | 2-5.5 Y         | ICD placement                             | Posttraumatic stress                          | 107 | Switzerland | 33       |
| Eating disorder PT                               | 3 Y             | Drug treatment and psychotherapy          | PT' compliance and types of treatments        | 102 | France      | 34       |
| Eating disorder PT                               | 3 Y             | Unspecified treatment                     | Response to treatment                         | 102 | France      | 35       |
| OutPT with major depression                      | 1 Y             | Unspecified treatment                     | Response to treatment                         | 86  | Finland     | 36       |
| PT with asthma                                   | 2 Y             | Unspecified treatment                     | Emergency room visits and QOL (SF-36)         | 76  | Spain       | 37       |
| OutPT with major depression                      | 10 W            | Antidepressant                            | Reduction of depression severity              | 65  | Turkey      | 38       |
| PT with type 1 Diabetes                          | 8 W             | Inpatient treatment                       | Decrease in HbA1c                             | 64  | Belgium     | 39       |
| Alcohol abuser                                   | 15 W            | Inpatient treatment                       | Maintaining abstinent                         | 46  | France      | 40       |
| PT with somatoform and anxiety disorders         | 2 Y             | Inpatient treatment                       | Symptom persistence                           | 30  | Austria     | 41       |
| <b>Beneficial effect</b>                         |                 |                                           |                                               |     |             |          |
| Cancer PT                                        | 6 M             | Multicomponent psychological intervention | Pain                                          | 104 | Italy       | 42       |
| PT taking in vitro fertilization                 | 6 M             | In vitro fertilization                    | Delivery of a living infant                   | 81  | Greece      | 43       |
| Colorectal cancer PT                             | 3 Y             | Surgery                                   | QOL (SF-36)                                   | 60  | Italy       | 44       |
| Ulcerative colitis PT                            | 17 M            | Pelvic pouch surgery                      | Psychosocial adjustment                       | 53  | Sweden      | 45       |
| Gynecologic PT                                   | 1 M             | Laparoscopy or laparotomy                 | QOL (SF-36)                                   | 40  | Italy       | 46       |
| <b>No association</b>                            |                 |                                           |                                               |     |             |          |
| Psychiatric inPT                                 | 4, 8-12 W       | Psychodynamic group therapy               | Global severity Index and depression severity | 297 | Germany     | 47       |
| OutPT with unexplained physical symptom          | 6 W             | Unspecified treatment                     | Symptom persistence                           | 127 | Netherlands | 48       |
| Pregnant women                                   | 1 M             | Unspecified                               | Depression development                        | 149 | Italy       | 49       |
| PT with psoriasis                                | 6 M             | Cognitive behavioral therapy              | Response to treatment                         | 80  | UK          | 50       |
| Obese outPT                                      | 8 M             | Behavioral program                        | Compliance and weight loss                    | 68  | Italy       | 51       |
| InPT taking respiratory rehabilitation           | 4 W             | Respiratory rehabilitation                | Functional recovery                           | 60  | Italy       | 52       |
| Panic disorder PT                                | 6 M             | CBT                                       | Response to treatment                         | 55  | Switzerland | 53       |
| Psychiatric consultation outPT                   | 1 Y             | Psychotherapy                             | PT's compliance                               | 54  | Finland     | 54       |
| OCD inPT                                         | 31-139 D        | Multimodal CBT                            | Response to treatment                         | 42  | Germany     | 55       |
| Bulimia nervosa PT                               | 10 W            | Drug treatment                            | Symptom improvements                          | 41  | England     | 56       |
| CFS outPT                                        | 18 M            | Unspecified treatment                     | Symptom improvements                          | 40  | Netherlands | 57       |
| OutPT with psoriasis                             | 3 M             | Dermatological treatment                  | Response to treatment                         | 40  | France      | 58       |
| OCD inPT                                         | 6 Y             | Inpatient treatment                       | OCD deterioration                             | 34  | Switzerland | 59       |
| Schizophrenia outPT                              | 1 Y             | Appropriate treatment                     | Symptom improvements                          | 29  | Italy       | 60       |
| Eating disorder inPT                             | 1 Y             | Psychoeducation                           | Dietary restraint                             | 19  | Switzerland | 61       |

PT=patient, OCD=obsessive-compulsive disorders, CFS=chronic fatigue syndrome, CBT=cognitive behavioral therapy, W=week, M=month, Y=year.
